# Supplementary material for: New insights into the interaction of triethylphosphine oxide with silica surface: exchange between different surface species
Source: Royal Society of Chemistry journal article supplement (doi:10.1039/d2cp01621d), 2022-01-01
Supplement: d2cp01621d1.pdf [file d2cp01621d1.pdf]

**Electronic Supplementary Information**

**New insights into the interaction of triethylphosphine oxide with silica  
surface: exchange between different surface species**

Elisabet Pires and José M. Fraile\*

*Instituto de Síntesis Química y Catálisis Homogénea (ISQCH), CSIC-Universidad de  
Zaragoza, Facultad de Ciencias, Pedro Cerbuna 12, E-50009 Zaragoza, Spain*

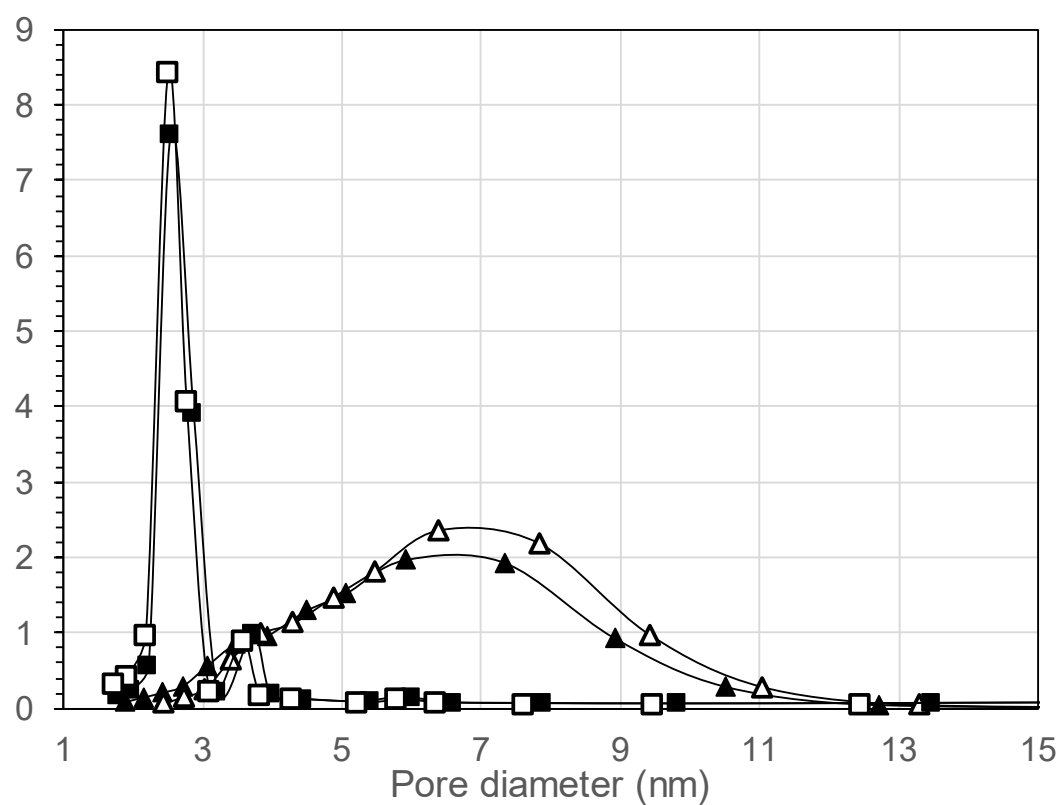

**Figure S1.** Pore size distribution of MCM-41 (squares) and Silia P60 (triangles), pretreated at 200°C (open symbols) and 500°C (filled symbols).

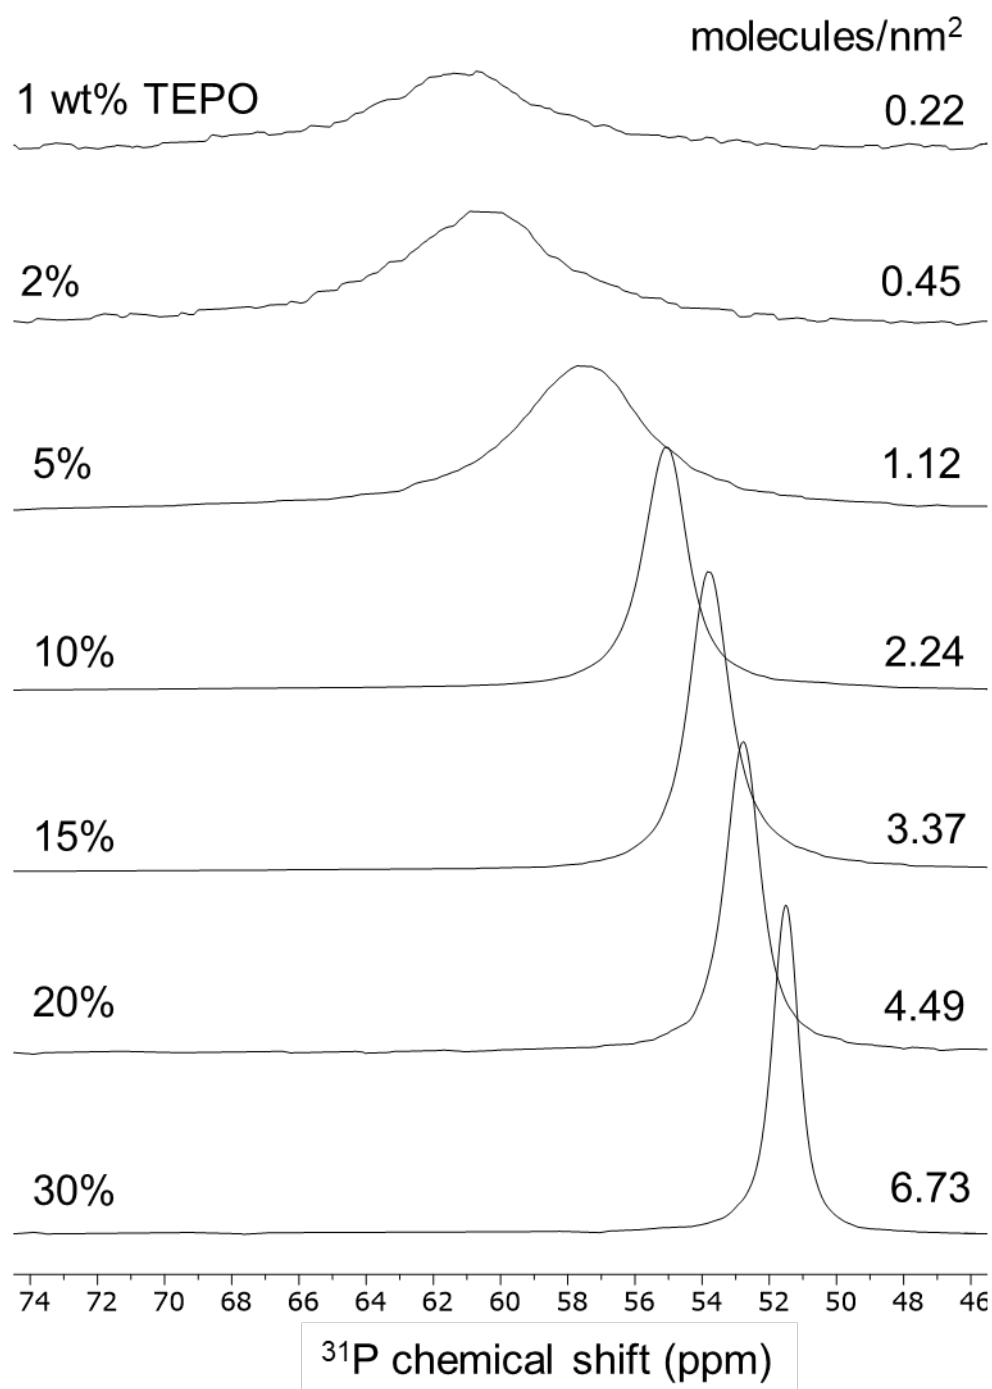

**Figure S2.** Variation of  $^{31}\text{P}$  chemical shift (ppm) of TEPO adsorbed on Aerosil 200 calcined at 500°C at different TEPO loadings and the corresponding surface coverage.

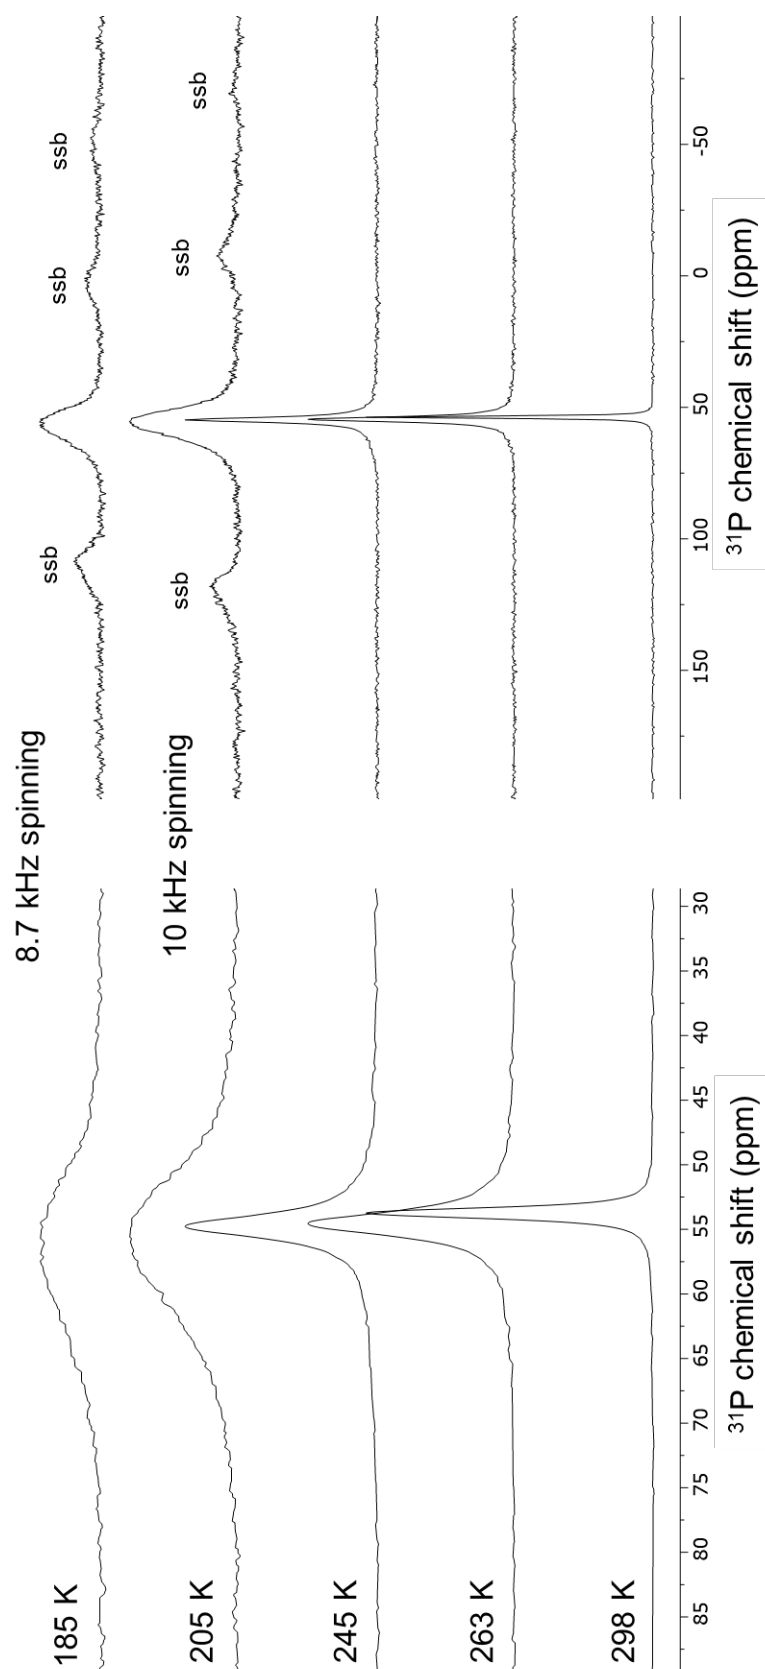

**Figure S3.** Effect of temperature on the  $^{31}\text{P}$  signal of TEPO adsorbed on Aerosil 200 calcined at  $500^\circ\text{C}$  at 20 wt% TEPO loading: central signal (left) and full range spectrum (right). SSB = spinning side bands.

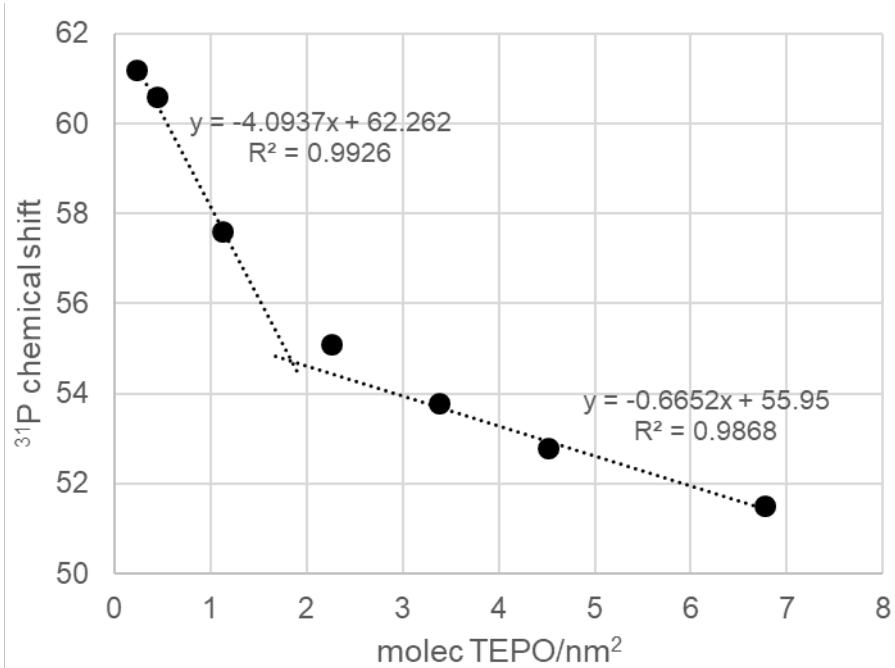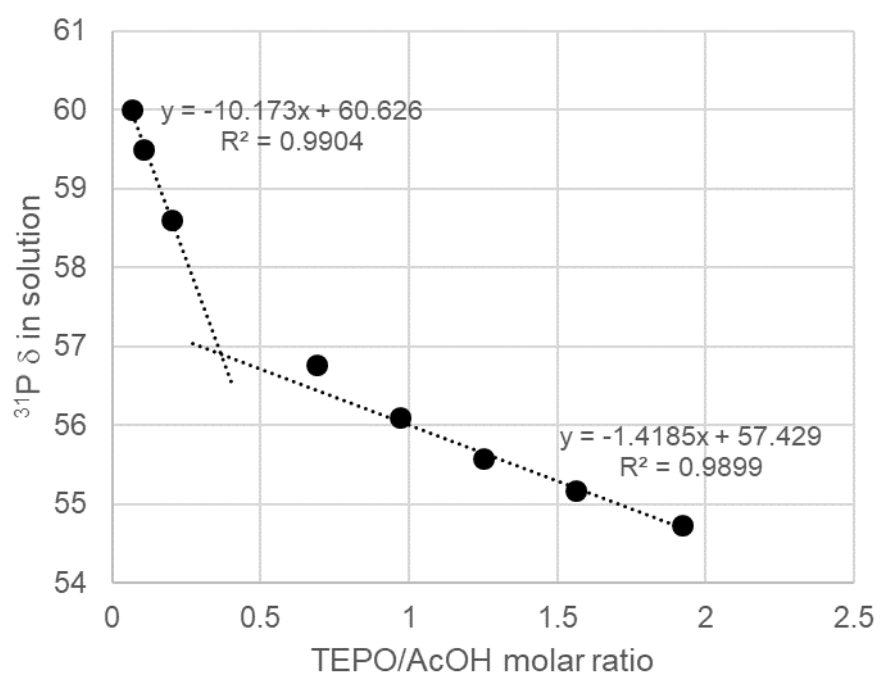

**Figure S4.** Comparison of the variation of  $^{31}\text{P}$  chemical shift (ppm) with TEPO surface coverage on Aerosil 200 calcined at 500°C and in solution with the TEPO/acetic acid molar ratio in  $\text{CDCl}_3$  (data taken from reference 13).

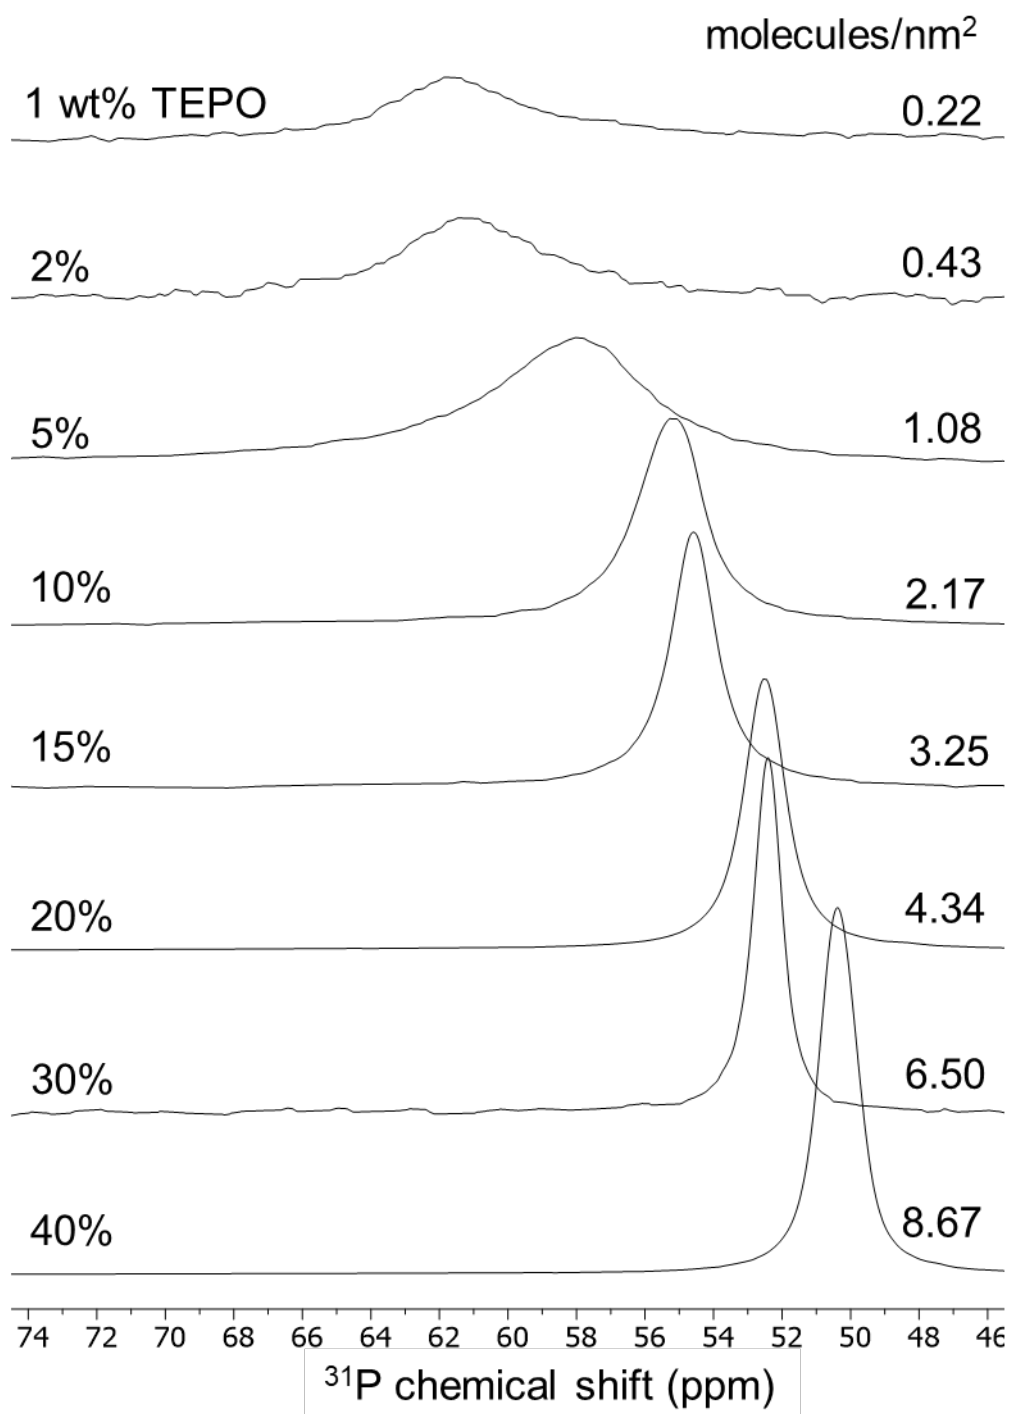

**Figure S5.** Variation of  $^{31}\text{P}$  chemical shift (ppm) of TEPO adsorbed on Aerosil 200 calcined at 200°C at different TEPO loadings and the corresponding surface coverage.

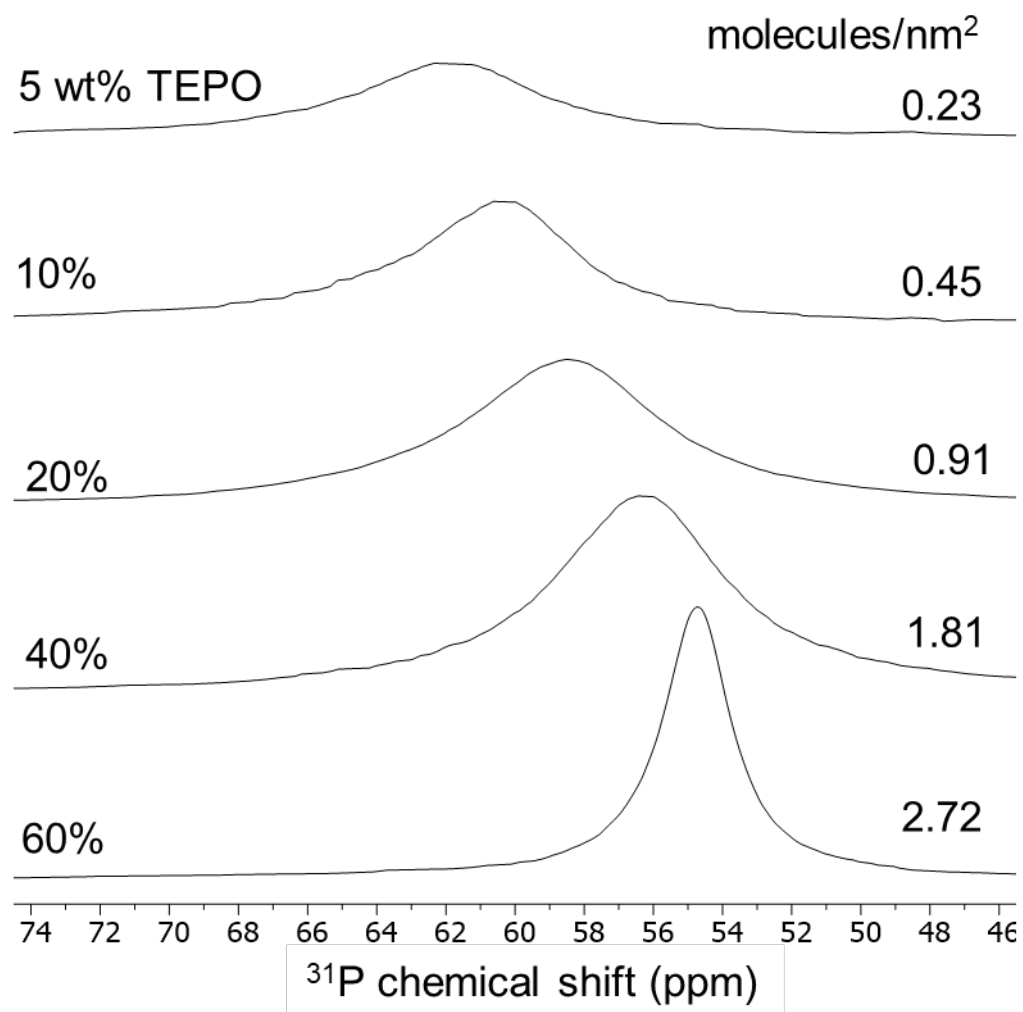

**Figure S6.** Variation of  $^{31}\text{P}$  chemical shift (ppm) of TEPO adsorbed on MCM-41 calcined at 500°C at different TEPO loadings and the corresponding surface coverage.

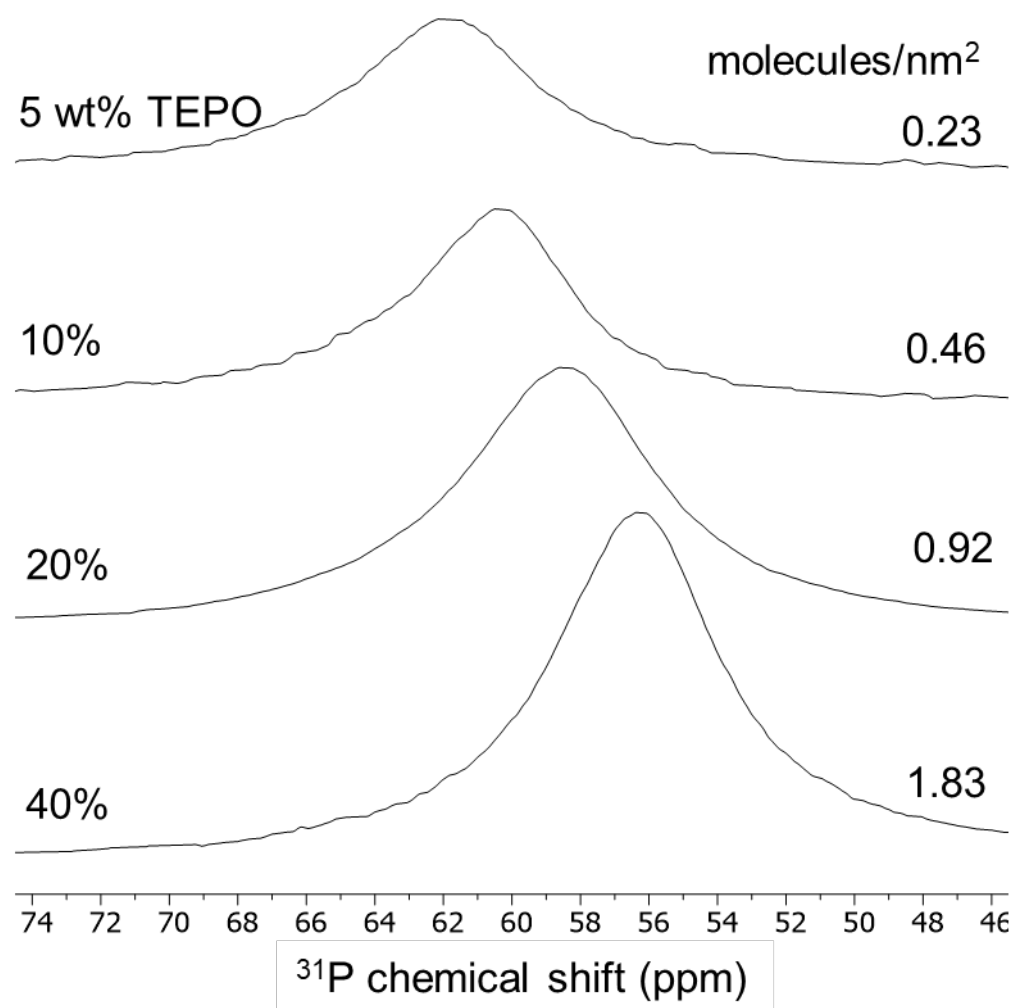

**Figure S7.** Variation of  $^{31}\text{P}$  chemical shift (ppm) of TEPO adsorbed on MCM-41 calcined at 200°C at different TEPO loadings and the corresponding surface coverage.



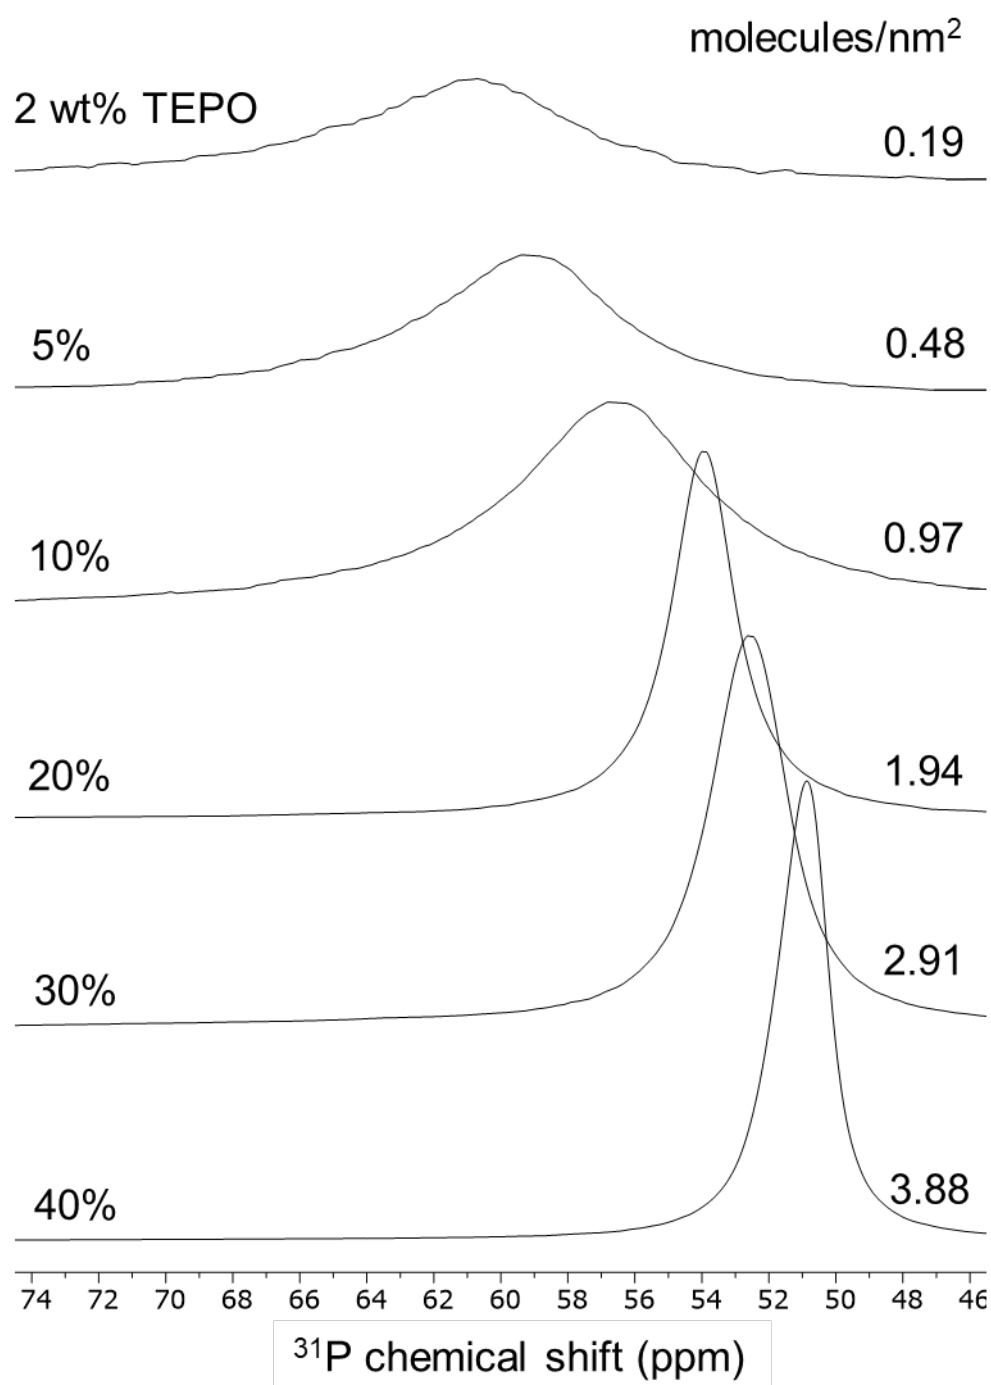

**Figure S8.** Variation of  $^{31}\text{P}$  chemical shift (ppm) of TEPO adsorbed on Silia P60 calcined at 500°C at different TEPO loadings and the corresponding surface coverage.

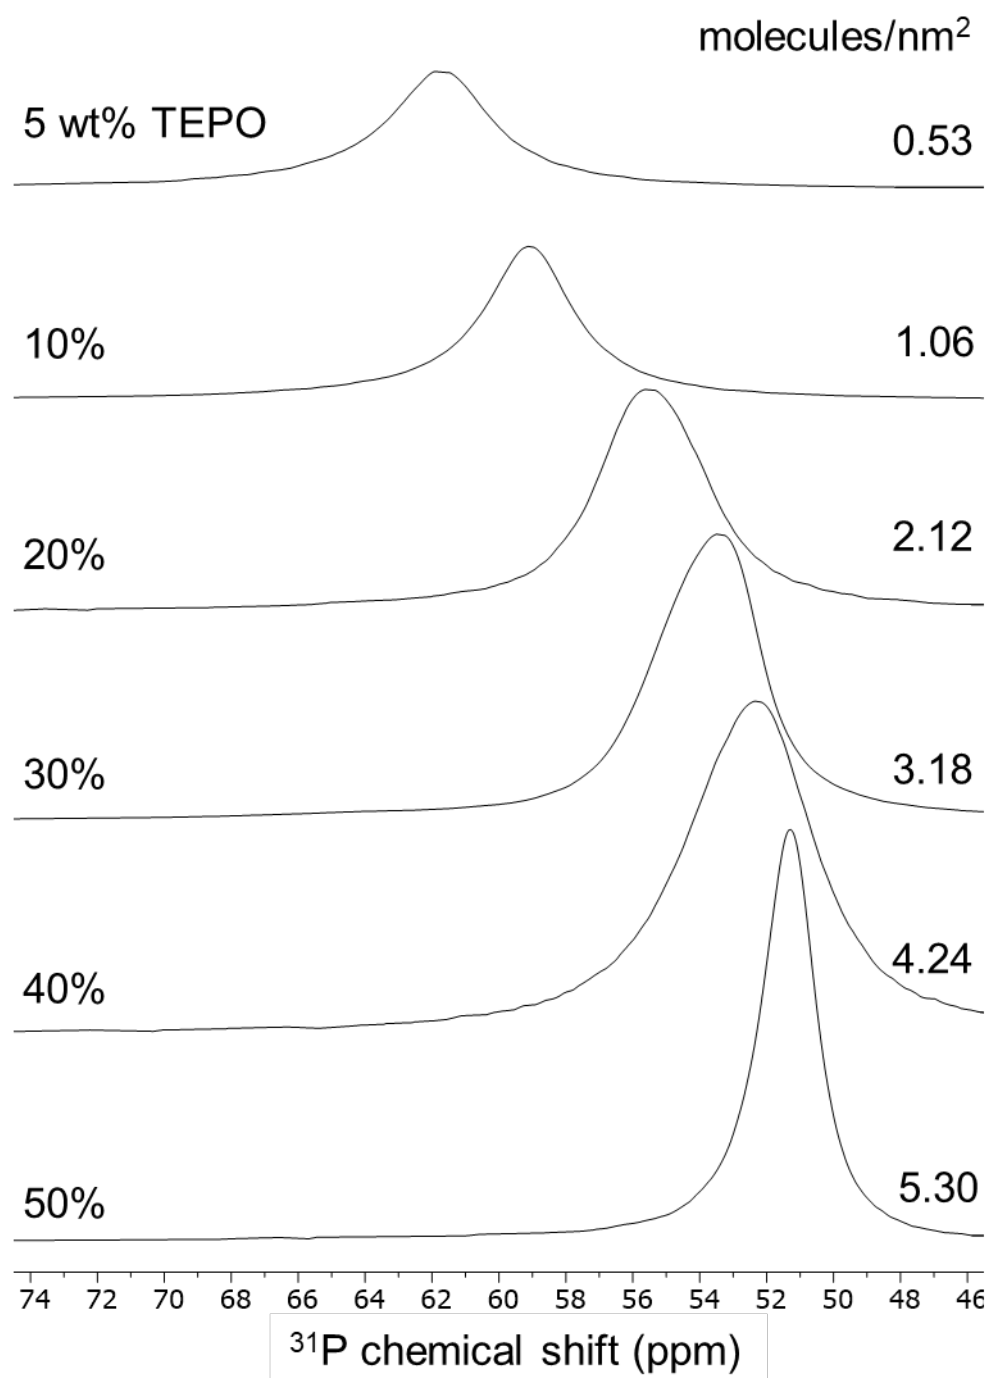

**Figure S9.** Variation of  $^{31}\text{P}$  chemical shift (ppm) of TEPO adsorbed on Silia P60 calcined at 200°C at different TEPO loadings and the corresponding surface coverage.
